# Supplementary material for: The efficacy of Virkon-S for the control of saprolegniasis in common carp, Cyprinus carpio L
Source: PeerJ. 2018 Oct 3;6:e5706. doi: 10.7717/peerj.5706 (PMC6173945; doi:10.7717/peerj.5706)
Supplement: Supplemental Information 1 — Raw data for cell viability test of EPC cells at different concentration of Virkon-S. [file peerj-06-5706-s001.xlsx]

## Sheet: Sheet1
Concentration (ppm)	Control	2	4	10	20	100
Replication 1	94.588	111.572	104.908	96.8633	-8.3699	1.21892
Replication 2	107.102	148.545	103.689	96.457	-11.2953	2.03153
Replication 3	101.17	115.31	96.7821	99.87	-9.99512	-1.4627
Replication 4	96.7821	109.865	101.008	98.4073	-10.4014	7.06972
Replication 5	100.358	99.6262	97.4321	96.9446	-13.6519	7.80107
Mean	100	116.984	100.764	97.7084	-10.7427	3.33171
SD	4.78496	18.5755	3.63138	1.41637	1.94128	3.97142
